# Supplementary material for: Factors associated with emotional distress in patients with myocardial infarction: Results from the SWEDEHEART registry
Source: PubMed Central journal article supplement — Eur J Prev Cardiol. 2018 Apr 25;25(9):910–20. doi: 10.1177/2047487318770510 (PMC6009178; doi:10.1177/2047487318770510), 2018-04-25
Supplement: Supplemental_material.pdf [file Supplemental_material.pdf]

**Appendix table 1.** Adjusted odds ratios of factors associated with emotional distress.

|                               | Some ED vs no ED <sup>a</sup><br>2 month post MI<br>Imputed,<br>adjusted ORs<br>(95 % CI)<br>N= 36,715 | Some ED vs no ED <sup>a</sup><br>12 month post MI<br>Imputed,<br>adjusted ORs<br>(95 % CI)<br>N= 33,327 | Persistent vs<br>Remittent ED <sup>b</sup><br>Imputed,<br>adjusted ORs<br>(95% CI)<br>N=11,072 |
|-------------------------------|--------------------------------------------------------------------------------------------------------|---------------------------------------------------------------------------------------------------------|------------------------------------------------------------------------------------------------|
| <b>Sociodemographics</b>      |                                                                                                        |                                                                                                         |                                                                                                |
| Age (increase by 5 years)     | 0.86 (0.85, 0.88)                                                                                      | 0.86 (0.84, 0.87)                                                                                       | 0.93 (0.90, 0.96)                                                                              |
| Female (vs Male)              | 2.30 (2.18, 2.42)                                                                                      | 2.18 (2.07, 2.30)                                                                                       | 1.55 (1.43, 1.69)                                                                              |
| <b>Employment</b>             |                                                                                                        |                                                                                                         |                                                                                                |
| Retired (vs Employed)         | 1.09 (1.03, 1.17)                                                                                      | 1.31 (1.22, 1.41)                                                                                       | 1.33 (1.19, 1.49)                                                                              |
| Other (vs Employed)           | 1.65 (1.50, 1.82)                                                                                      | 1.96 (1.76, 2.18)                                                                                       | 1.82 (1.55, 2.14)                                                                              |
| <b>Country of birth</b>       |                                                                                                        |                                                                                                         |                                                                                                |
| Nordic countries (vs Sweden)  | 1.07 (0.96, 1.20)                                                                                      | 0.96 (0.86, 1.08)                                                                                       | 1.00 (0.83, 1.20)                                                                              |
| Rest of the world (vs Sweden) | 2.00 (1.85, 2.17)                                                                                      | 1.95 (1.80, 2.12)                                                                                       | 1.53 (1.34, 1.75)                                                                              |
| <b>Smoking</b>                |                                                                                                        |                                                                                                         |                                                                                                |
| Current (vs never)            | 1.37 (1.30, 1.46)                                                                                      | 1.33 (1.25, 1.42)                                                                                       | 1.14 (1.03, 1.26)                                                                              |
| Former (vs never)             | 1.11 (1.05, 1.17)                                                                                      | 1.09 (1.02, 1.15)                                                                                       | 0.99 (0.90, 1.10)                                                                              |

**Medical history**

|                            |                   |                   |                   |
|----------------------------|-------------------|-------------------|-------------------|
| Diabetes (yes vs no)       | 1.08 (1.01, 1.16) | 1.10 (1.02, 1.18) | 1.11 (0.99, 1.25) |
| Hypertension (yes vs no)   | 1.10 (1.04, 1.15) | 1.08 (1.02, 1.14) | 1.03 (0.94, 1.12) |
| Stroke (yes vs no)         | 1.09 (0.97, 1.22) | 1.22 (1.07, 1.38) | 1.34 (1.07, 1.66) |
| Hyperlipidemia (yes vs no) | 1.12 (1.05, 1.19) | 1.10 (1.03, 1.18) | 1.06 (0.95, 1.18) |

**Psychiatric history (diagnosis of)**

|                                                      |                   |                   |                   |
|------------------------------------------------------|-------------------|-------------------|-------------------|
| Depression/anxiety <sup>c</sup> (yes vs no)          | 3.52 (3.02, 4.10) | 3.34 (2.84, 3.93) | 2.19 (1.77, 2.72) |
| Schizophrenia and similar <sup>c,d</sup> (yes vs no) | 1.00 (0.67, 1.51) | 1.10 (0.68, 1.77) | 1.47 (0.65, 3.34) |
| Substance abuse <sup>c</sup> (yes vs no)             | 1.07 (0.98, 1.17) | 1.09 (0.99, 1.21) | 1.18 (1.01, 1.38) |

**Cardiac status**

## Killip class at admission

|                                              |                   |                   |                   |
|----------------------------------------------|-------------------|-------------------|-------------------|
| Class II-IV (vs Class I)                     | 0.98 (0.90, 1.07) | 1.12 (1.03, 1.23) | 1.08 (0.93, 1.25) |
| Chest pain at admission (yes vs no)          | 1.01 (0.91, 1.12) | 1.05 (0.94, 1.18) | 1.00 (0.83, 1.20) |
| Dyspnea at admission (yes vs no)             | 0.98 (0.83, 1.15) | 0.94 (0.79, 1.13) | 0.95 (0.71, 1.27) |
| Cardiac arrest at admission (yes vs no)      | 0.96 (0.76, 1.22) | 0.95 (0.74, 1.23) | 1.12 (0.74, 1.71) |
| Heart rate at admission (per +10 bpm)        | 1.01 (1.00, 1.02) | 1.01 (1.00, 1.02) | 1.00 (0.98, 1.02) |
| Atrial fibrillation at discharge (yes vs no) | 1.02 (0.87, 1.20) | 1.01 (0.85, 1.21) | 0.91 (0.68, 1.21) |
| LVEF at discharge                            |                   |                   |                   |

|                                                     |                   |                   |                   |
|-----------------------------------------------------|-------------------|-------------------|-------------------|
| <50% (vs normal ≥50%)                               | 1.03 (0.98, 1.09) | 1.11 (1.05, 1.17) | 1.14 (1.04, 1.26) |
| Not measured                                        | 1.00 (0.94, 1.07) | 1.01 (0.94, 1.08) | 0.99 (0.88, 1.11) |
| Complication during intake <sup>e</sup> (yes vs no) | 1.15 (0.96, 1.37) | 1.15 (0.95, 1.38) | 0.98 (0.73, 1.31) |
| <b>Hospital and cardiac care</b>                    |                   |                   |                   |
| Teaching hospital (yes vs no)                       | 1.13 (1.06, 1.19) | 1.05 (0.99, 1.12) | 1.00 (0.91, 1.11) |
| Hospital size                                       |                   |                   |                   |
| Medium (vs small)                                   | 1.10 (1.02, 1.18) | 1.02 (0.94, 1.11) | 0.96 (0.85, 1.10) |
| Large (vs small)                                    | 1.21 (1.12, 1.31) | 1.17 (1.08, 1.27) | 1.13 (0.99, 1.29) |
| Interventions                                       |                   |                   |                   |
| CABG (vs no treatment)                              | 0.77 (0.67, 0.87) | 0.82 (0.72, 0.93) | 0.84 (0.67, 1.05) |
| PCI (vs no treatment)                               | 0.91 (0.85, 0.97) | 0.99 (0.93, 1.07) | 1.08 (0.97, 1.21) |
| Thrombolytics (vs no treatment)                     | 1.05 (0.78, 1.42) | 0.70 (0.50, 0.99) | 0.79 (0.49, 1.30) |
| Cardiac medication coverage <sup>f</sup>            |                   |                   |                   |
| ≤2/4 medications (vs 4/4)                           | 1.10 (1.00, 1.20) | 1.07 (0.97, 1.19) | 1.27 (1.07, 1.51) |
| ¾ medications (vs 4/4)                              | 1.03 (0.98, 1.09) | 1.05 (0.99, 1.11) | 1.09 (0.99, 1.19) |
| Length of hospital stay                             |                   |                   |                   |
| 3-5 days (vs 0 - 2 days)                            | 1.17 (1.09, 1.25) | 1.04 (0.96, 1.12) | 1.06 (0.94, 1.20) |
| 6 days or more (vs 0 - 2 days)                      | 1.31 (1.21, 1.42) | 1.23 (1.12, 1.34) | 1.13 (0.98, 1.30) |

|                                               |                   |                   |                   |
|-----------------------------------------------|-------------------|-------------------|-------------------|
| Readmission CV event <sup>g</sup> (yes vs no) | 2.01 (1.85, 2.20) | 1.50 (1.36, 1.66) | 1.06 (0.93, 1.21) |
|-----------------------------------------------|-------------------|-------------------|-------------------|

Fully adjusted models utilizing logistic regression models were imputed missing values on the exposure variables were based on chained equations and predictive mean matching. <sup>a</sup>Some emotional distress (ED) corresponds to response category 2 and 3 and no ED corresponds to response category 1 in the EuroQol-5D item pertaining to ED. <sup>b</sup>Persistent ED corresponds to some ED at both 2 and 12 months, remittent ED corresponds to some ED at 2 months only. <sup>c</sup>Within 6 month prior to MI. <sup>d</sup>ICD codes F20-29. <sup>e</sup>Bleeding and/or cardiogenic shock. <sup>f</sup>1) beta blockers, 2) statins, 3) other lipid lowering drugs, and 4) angiotensin converting enzyme inhibitor or angiotensin II receptor blockers. <sup>g</sup>During the first 30 days.
